# Supplementary material
Source: Springer Nature journal article supplement (https://www.springermedizin.de/resource/supplementary/12876_2014_1170_MOESM2_ESM.pdf/9438232)

**A****Weight Gain**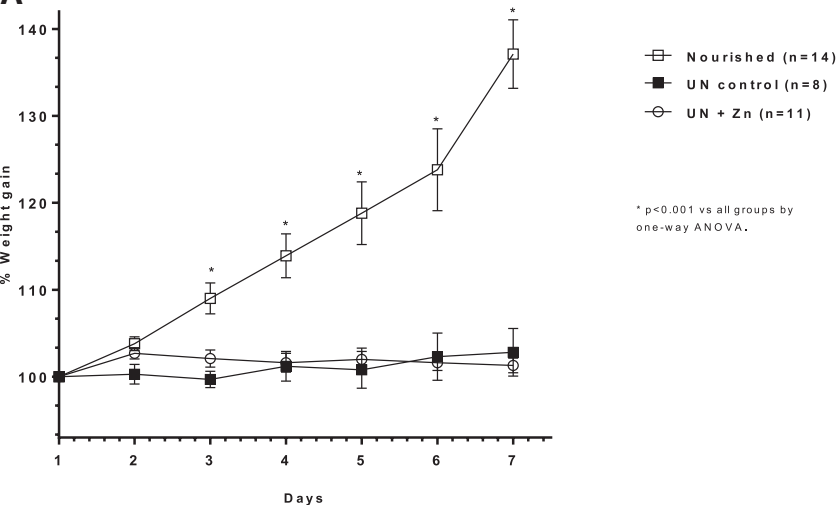**B****Weight Gain**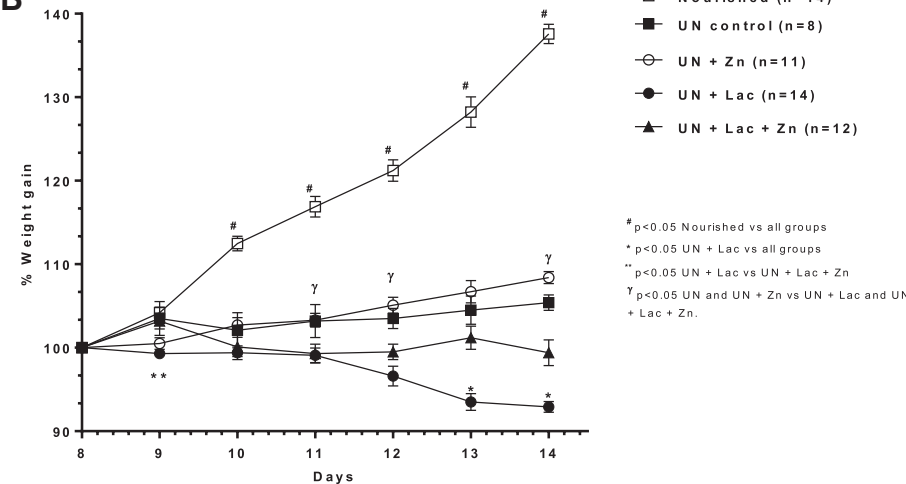

Supplement: MOESM2 [file 9438232]
